# Supplementary material
Source: PubMed Central journal article supplement (PMC4180715)
Supplement: NIHMS588379-supplement-Legacy_Supplemental_File.pdf [file NIHMS588379-supplement-Legacy_Supplemental_File.pdf]

## **Supplemental Figure Legends**

**Supplemental Figure I.** Representative fluorescence micrographs (x400) showing GFP-labeled IL8RA/B-ECs in frozen lung section and blood smear of MCT treated rats 24 hrs after transfusion of IL8RA/B-ECs. It is not clear whether the GFP cells were located in blood vessels or lung parenchyma due to the low resolution of the unfixed tissue. Yellow stained cells are GFP-positive cells. Blue stained nuclei are DAPI-labeled nuclei. GFP cells could be seen in blood smears, but not other tissues, including heart, kidney, liver and brain.

**Supplemental Figure II.** Effects of IL8RA/B-EC, Null-EC, or vehicle transfusion on MCT-induced decrease in eNOS expression (brown stained cells) in pulmonary arterioles in rat lungs 4 wks after transfusion of ECs.

**Supplemental Figure III.** Effects of IL8RA/B-EC, Null-EC, or vehicle transfusion on MCT-induced decrease in eNOS expression (brown stained cells) in alveoli in rat lungs 4 wks after transfusion of ECs.

**Supplemental Figure IV.** Effects of IL8RA/B-EC, Null-EC, or vehicle transfusion on MCT-induced increase in iNOS expression (brown stained cells) in pulmonary arterioles in rat lungs 4 wks after transfusion of ECs.

**Supplemental Figure V.** Effects of IL8RA/B-EC, Null-EC, or vehicle transfusion on MCT-induced increase in iNOS expression (brown stained cells) in alveoli in rat lungs 4 wks after transfusion of ECs.

**Supplemental Figure VI.** Effects of IL8RA/B-EC, Null-EC, or vehicle transfusion on MCT-induced increase in IL-8 (CINC-2•) expression (brown stained cells) in pulmonary arterioles in rat lungs 4 wks after transfusion of ECs. CINC-2• -

cytokine induced neutrophil chemoattractant-2-beta (equivalent to human IL-8)

**Supplemental Figure VII.** Effects of IL8RA/B-EC, Null-EC, or vehicle transfusion on MCT-induced increase in IL8 (CINC-2•) expression (brown stained cells) in alveoli in rat lungs 4 wks after transfusion of ECs.

**Supplemental Figure VIII.** Effects of IL8RA/B-EC, Null-EC, or vehicle transfusion on MCT-induced increase in MCP-1 expression (brown stained cells) in pulmonary arterioles in rat lungs 4 wks after transfusion of ECs. MCP-1 - monocyte chemotactic protein-1.

**Supplemental Figure IX.** Effects of IL8RA/B-EC, Null-EC, or vehicle transfusion on MCT-induced increase in MCP-1 expression (brown stained cells) in alveoli in rat lungs 4 wks after transfusion of ECs.

**Supplemental Figure X.** Effects of IL8RA/B-EC, Null-EC, or vehicle transfusion on MCT-induced infiltration of neutrophils (brown stained cells) in pulmonary arterioles in rat lungs 4 wks after transfusion of ECs.

**Supplemental Figure XI.** Effects of IL8RA/B-EC, Null-EC, or vehicle transfusion on MCT-induced infiltration of neutrophils (brown stained cells) in alveoli in rat lungs 4 wks after transfusion of ECs.

**Supplemental Figure XII.** Effects of IL8RA/B-EC, Null-EC, or vehicle transfusion on MCT-induced infiltration of monocytes/macrophages (brown stained cells) in pulmonary arterioles in rat lungs 4 wks after transfusion of ECs.

**Supplemental Figure XIII.** Effects of IL8RA/B-EC, Null-EC, or vehicle transfusion on MCT-induced infiltration of monocytes/macrophages (brown stained cells) in alveoli in rat lungs 4 wks after transfusion of ECs.

**IL8RA/RB-ECs (GFP marked) in lung of rat treated with MCT**

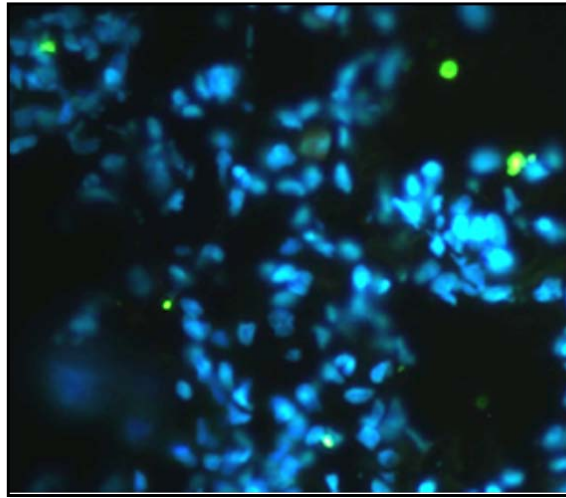

**GFP labeled IL8RA/RB-ECs in Blood at 1 day after transfusion. A) Dark field, and B) Bright field**

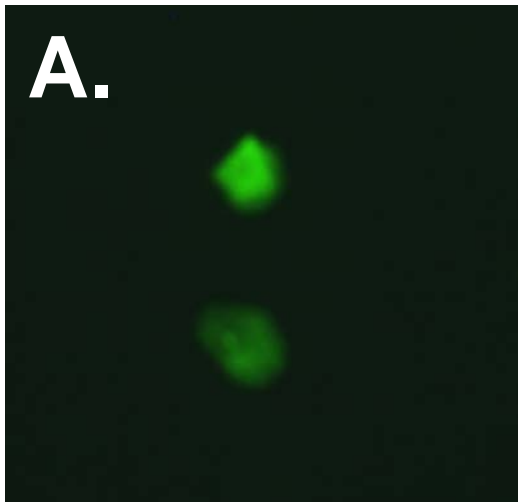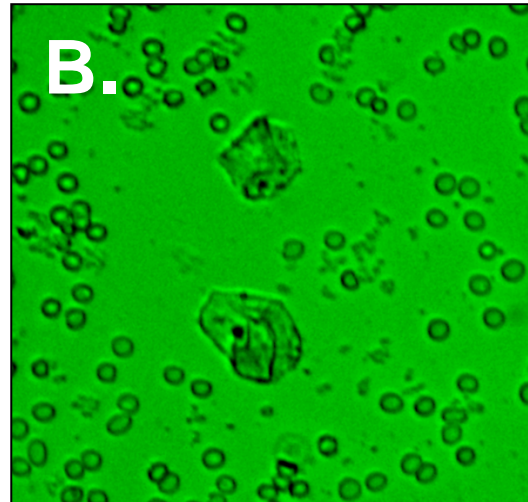

Supplemental Figure I

## eNOS Positive Cells in Pulmonary Arterioles

**Vehicle**

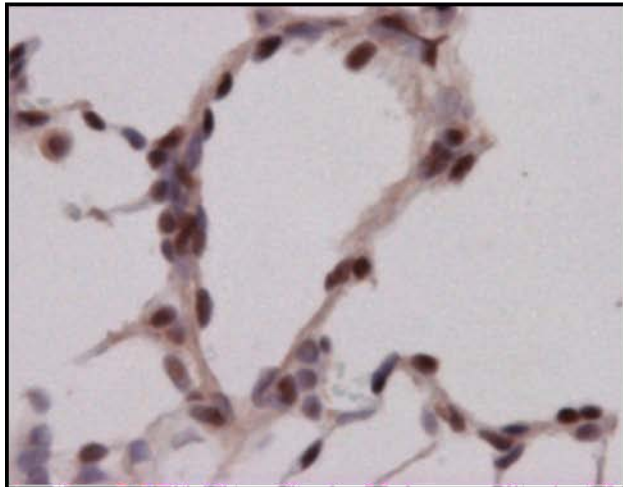

**MCT Alone**

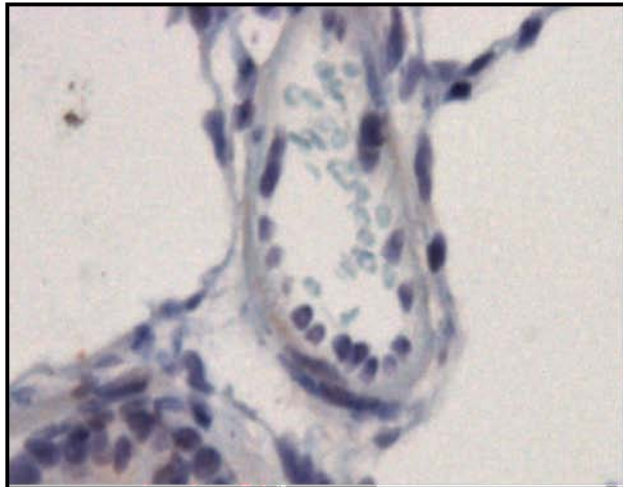

**MCT+Null-ECs**

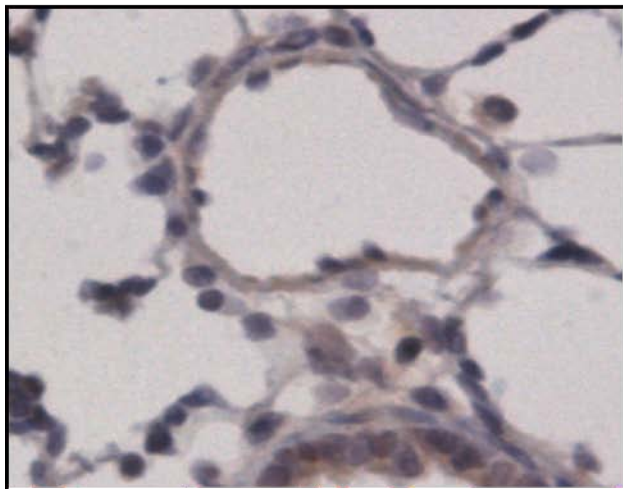

**MCT+IL8RA/B-ECs**

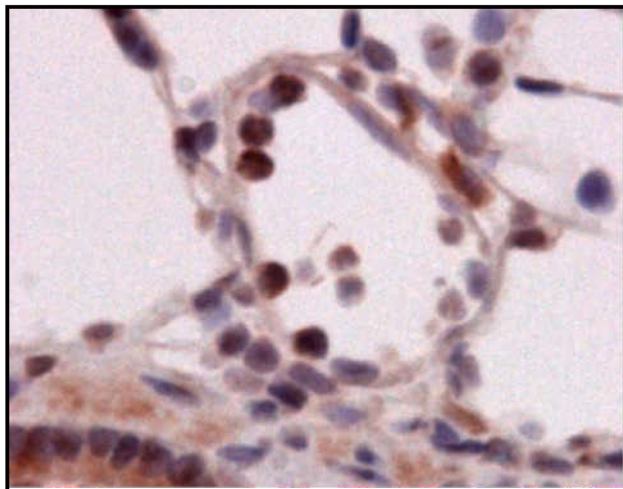

Supplemental Figure II

## eNOS Positive Cells in Alveoli

**Vehicle**

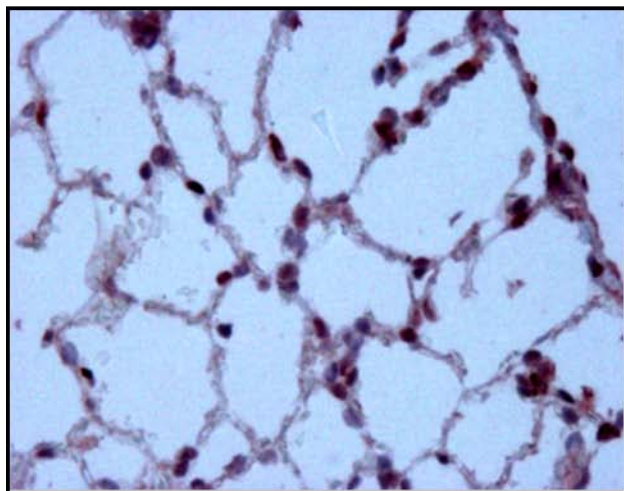

**MCT Alone**

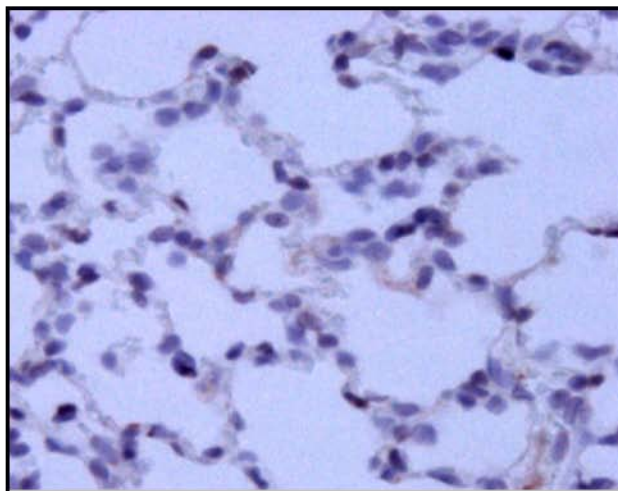

**MCT+Null-ECs**

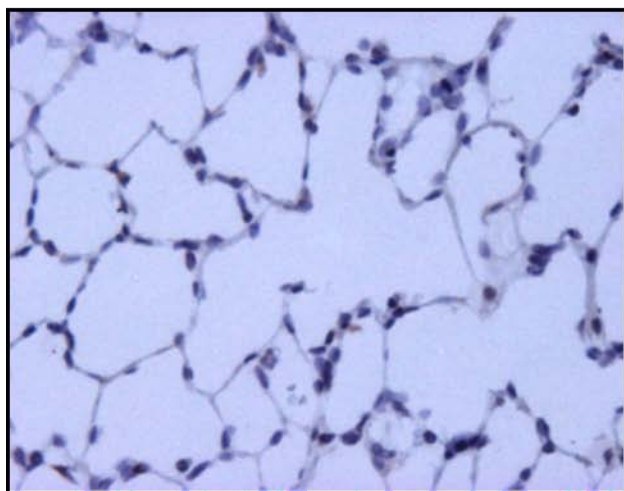

**MCT+IL8RA/B-ECs**

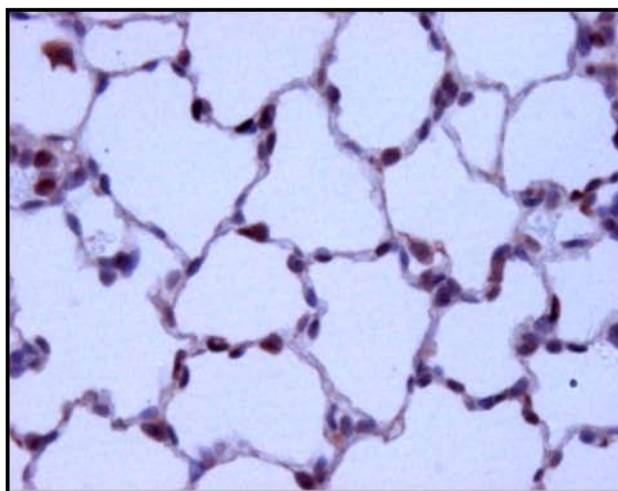

Supplemental Figure III



## iNOS Positive Cells on Pulmonary Arterioles

**Vehicle**

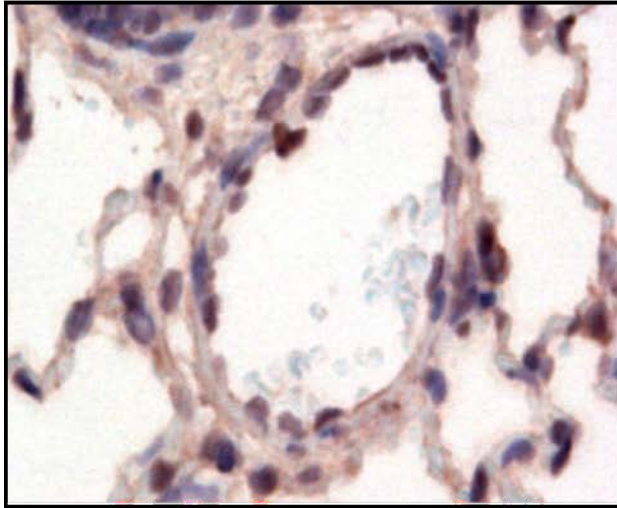

**MCT Alone**

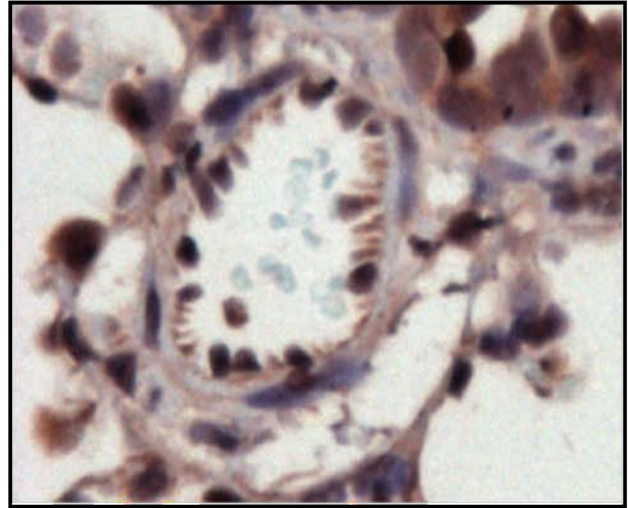

**MCT+Null-ECs**

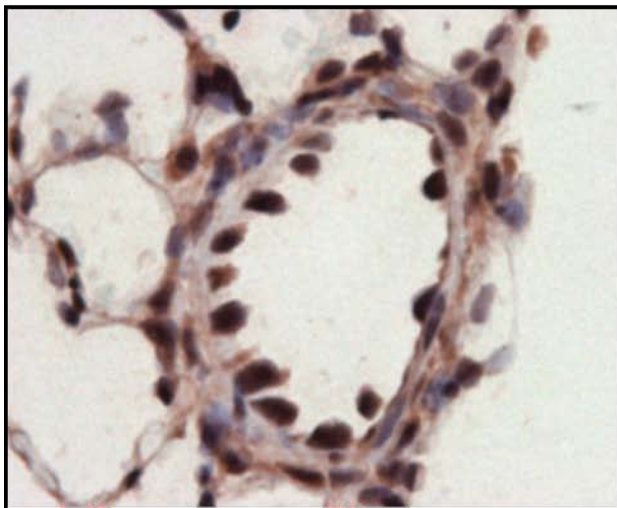

**MCT+IL8RA/B-ECs**

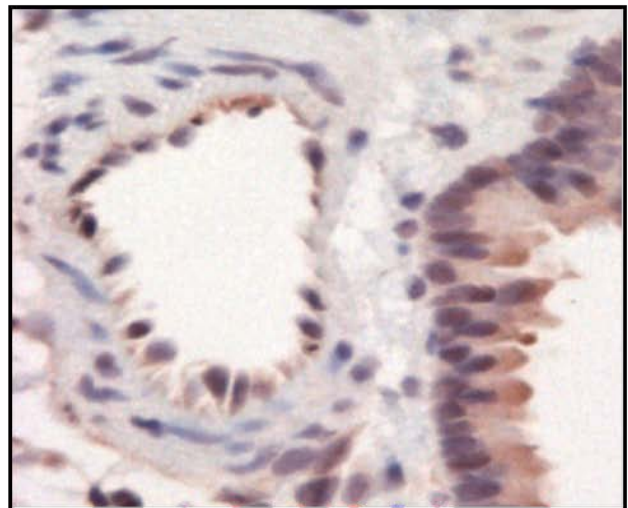

Supplemental Figure IV

## iNOS Positive Cells in Alveoli

**Vehicle**

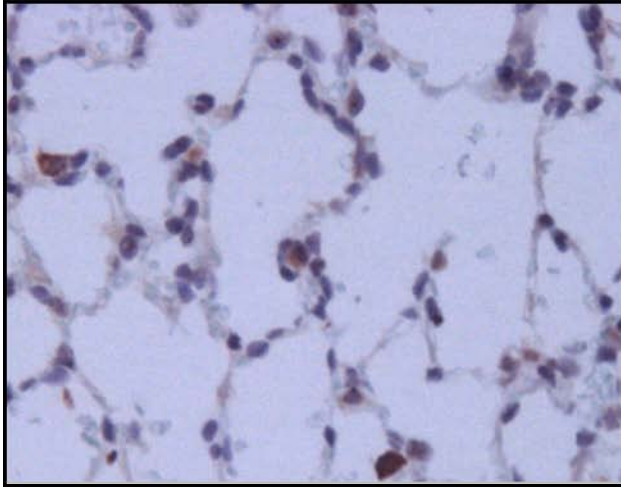

**MCT Alone**

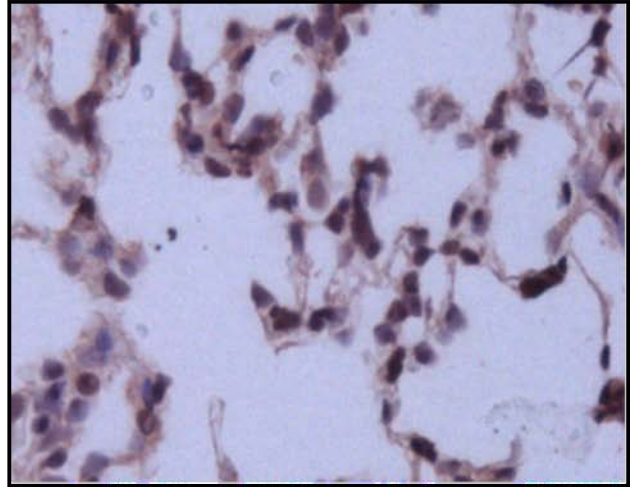

**MCT+Null-ECs**

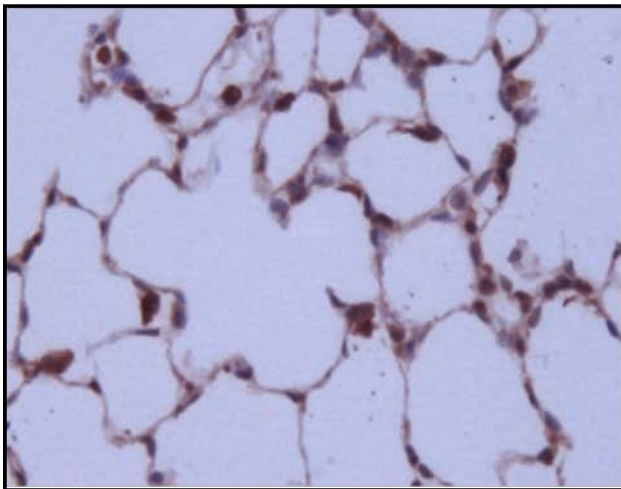

**MCT+IL8RA/B-ECs**

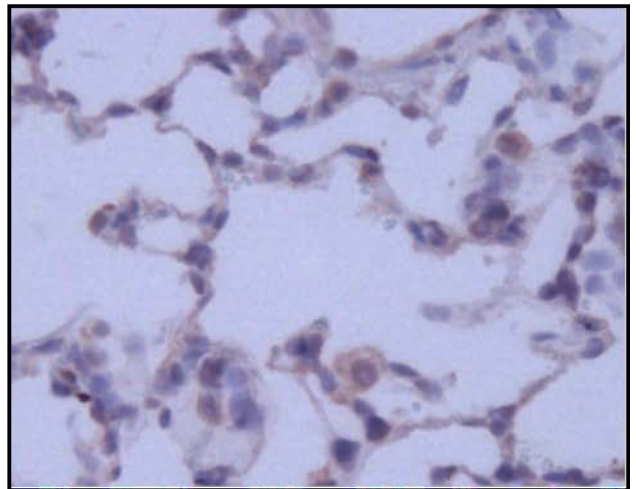

Supplemental Figure V

## IL8 Positive Cells in Pulmonary Arterioles

**Vehicle**

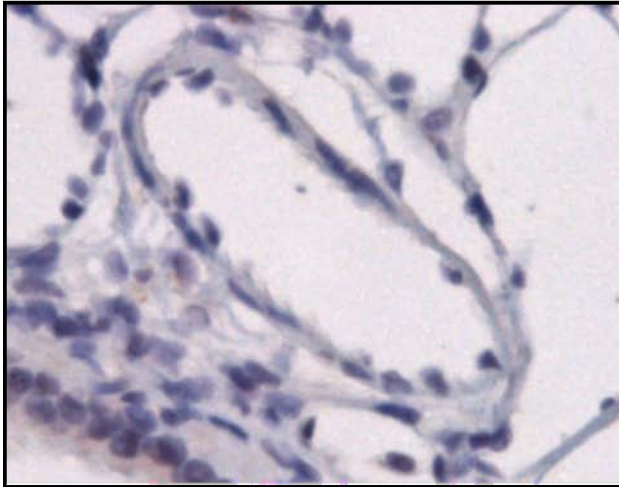

**MCT Alone**

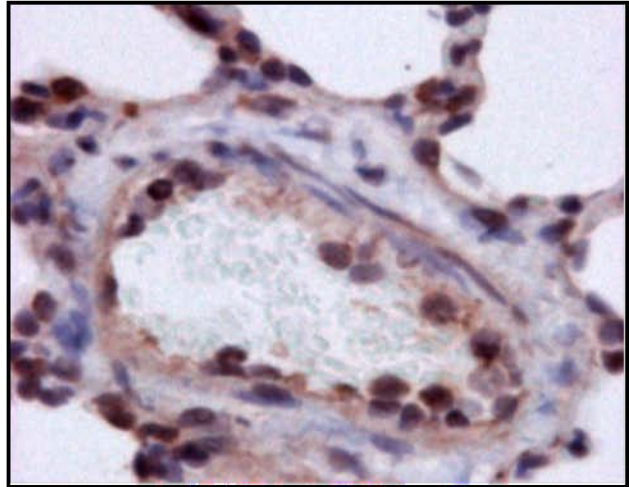

**MCT+Null-ECs**

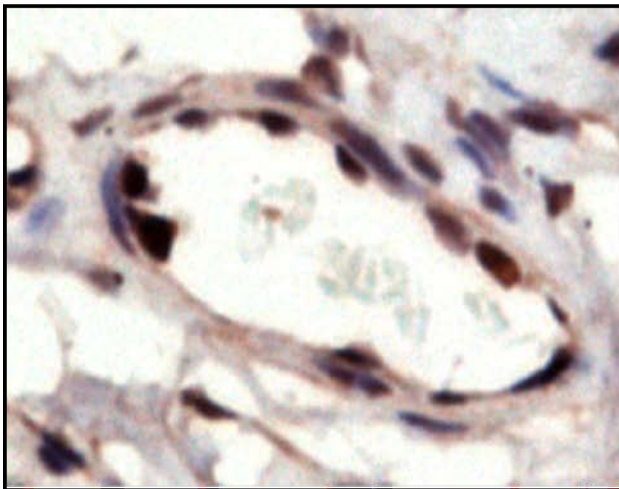

**MCT+IL8RA/B-ECs**

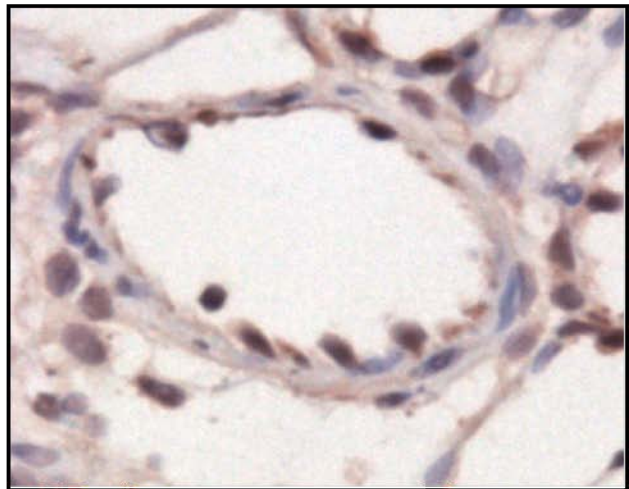

Supplemental Figure VI



## IL8 Positive Cells in Alveoli

**Vehicle**

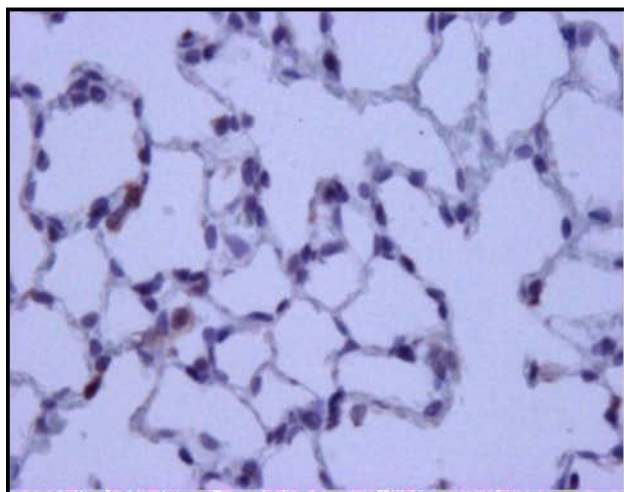

**MCT Alone**

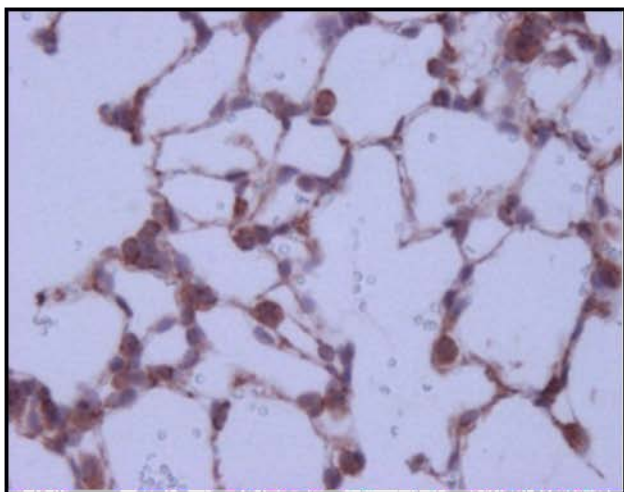

**MCT+Null-ECs**

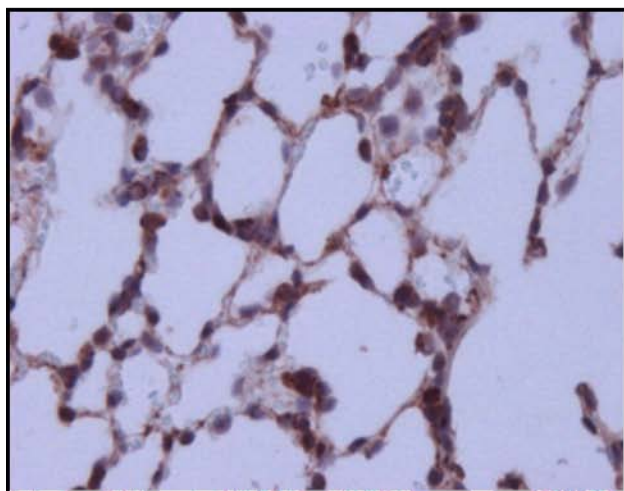

**MCT+IL8RA/B-ECs**

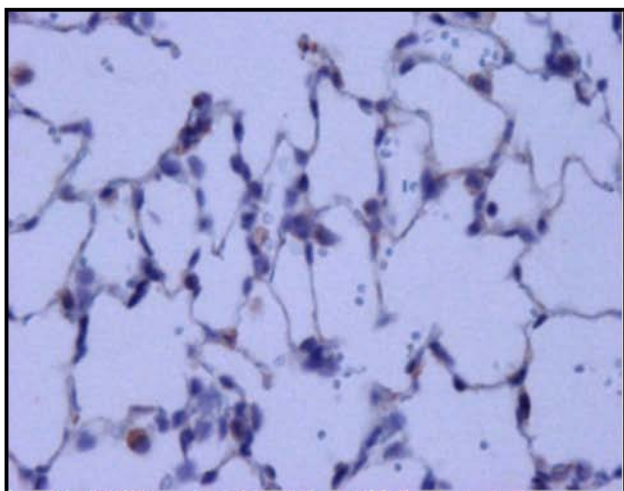

Supplemental Figure VII

## MCP-1 Positive Cells in Pulmonary Arterioles

**Vehicle**

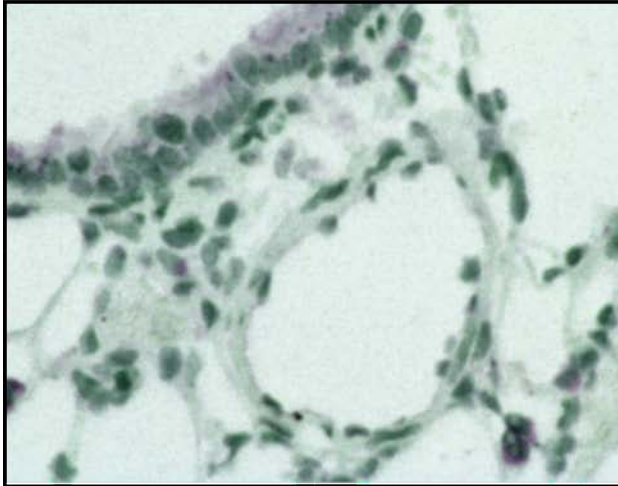

**MCT Alone**

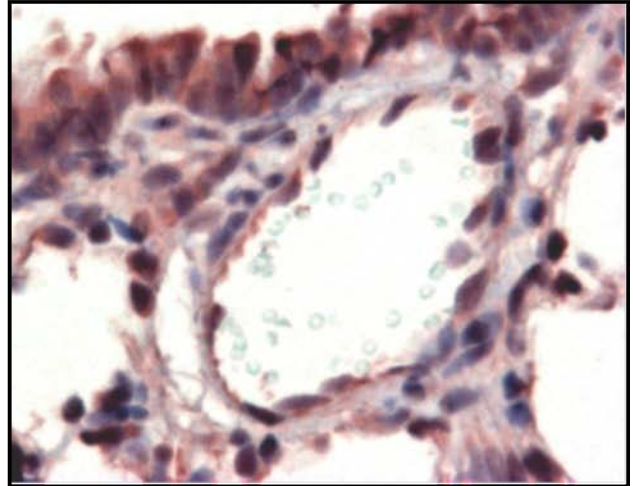

**MCT+Null-ECs**

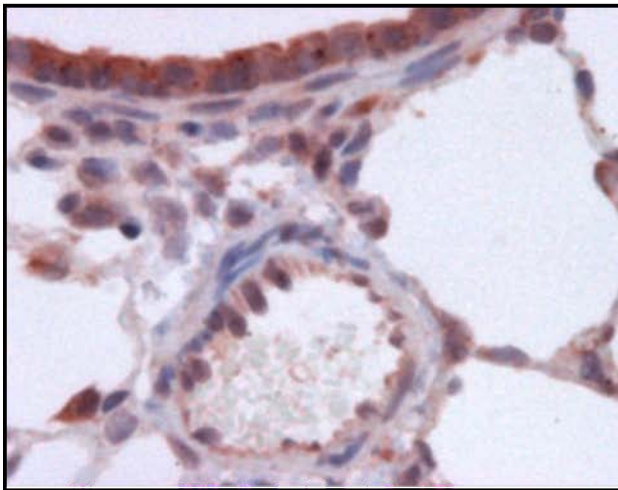

**MCT+IL8RA/B-ECs**

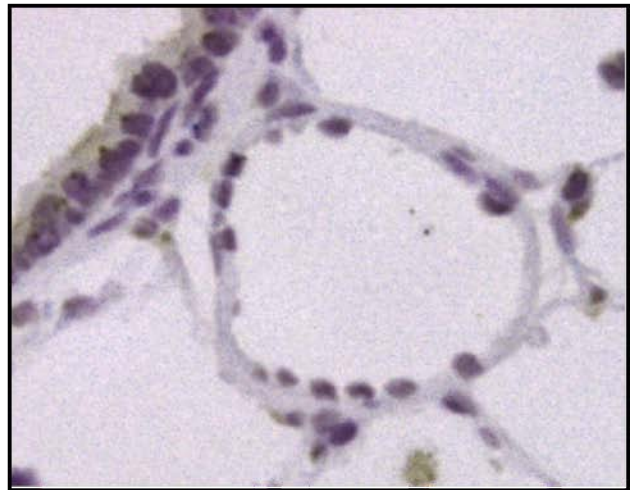

Supplemental Figure VIII

## MCP-1 Positive Cells in Alveoli

**Vehicle**

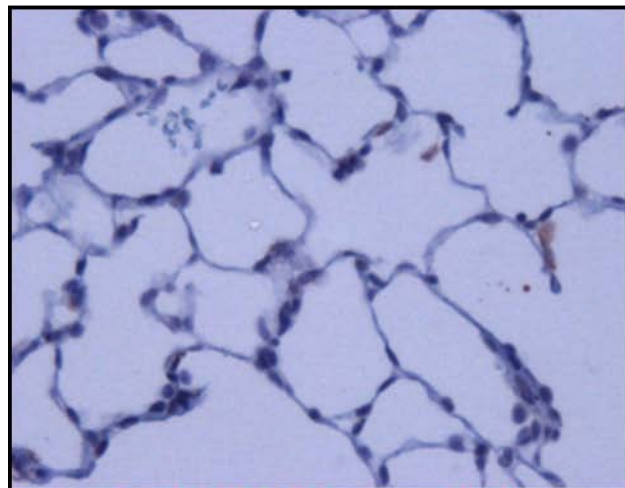

**MCT Alone**

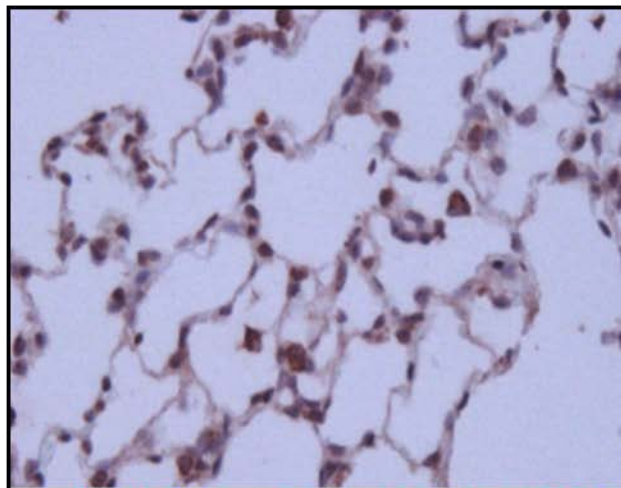

**MCT+Null-ECs**

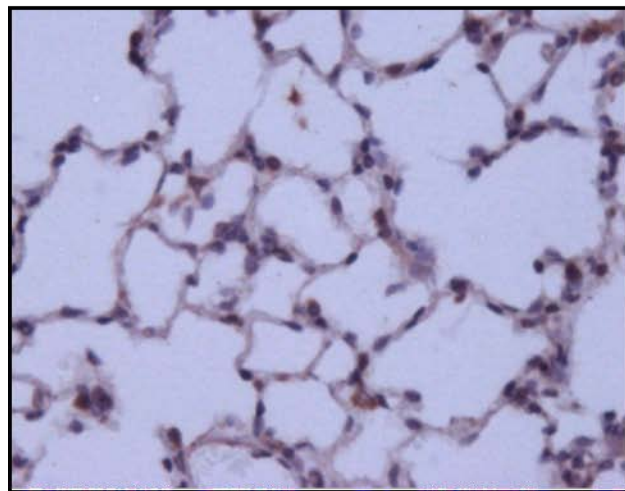

**MCT+IL8RA/B-ECs**

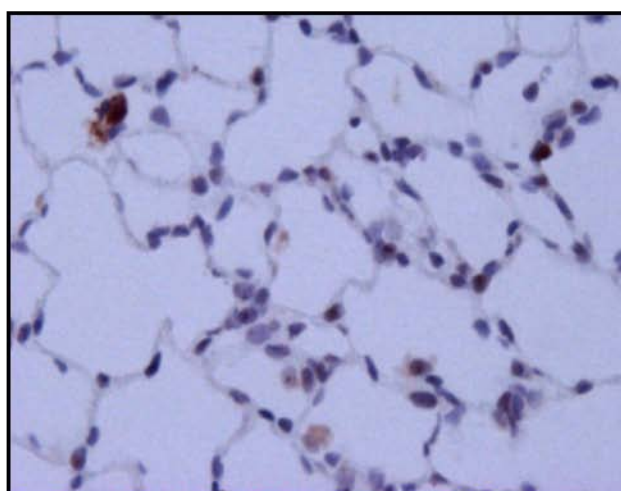

Supplemental Figure IX



## Neutrophils in Pulmonary Arterioles

**Vehicle**

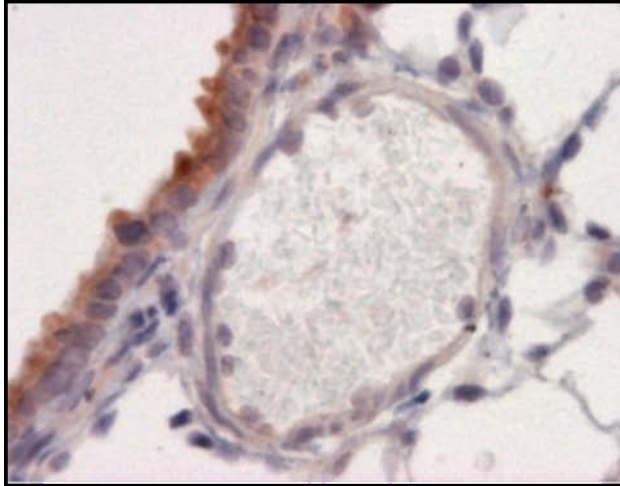

**MCT Alone**

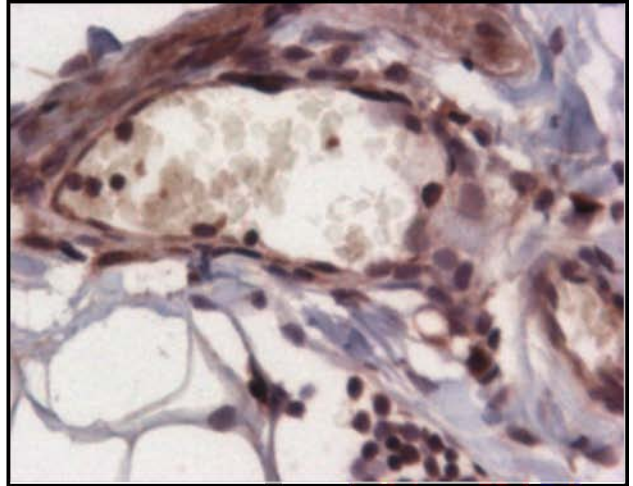

**MCT+Null-ECs**

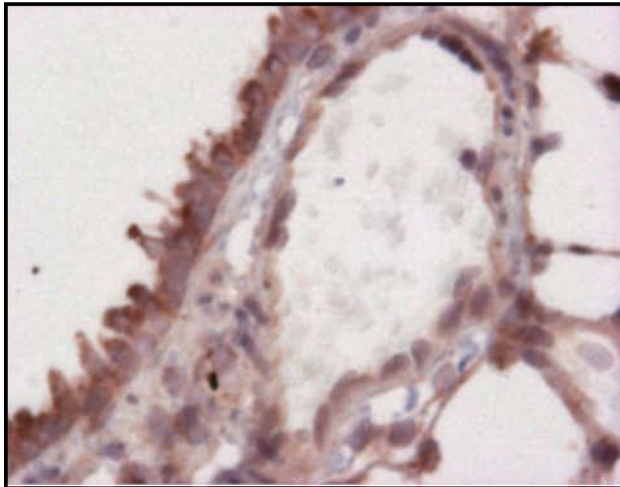

**MCT+IL8RA/B-ECs**

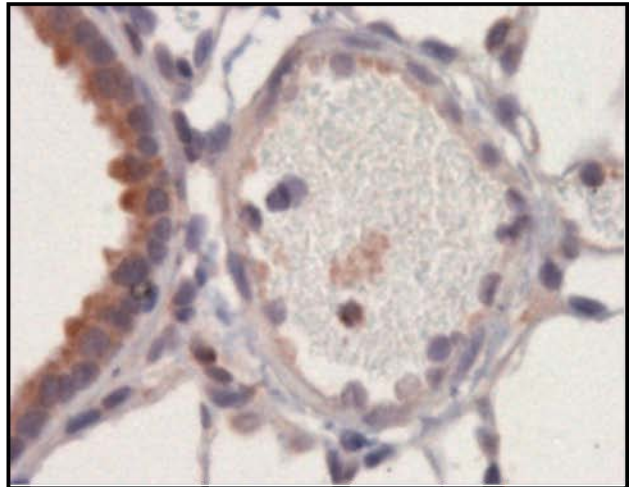

Supplemental Figure X



## Neutrophils in Alveoli

**Vehicle**

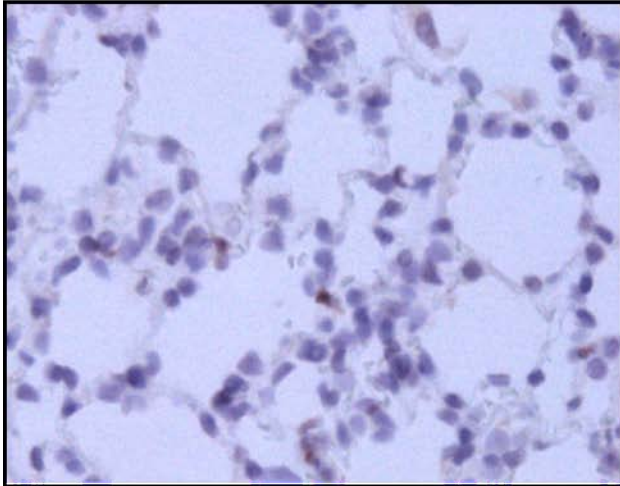

**MCT Alone**

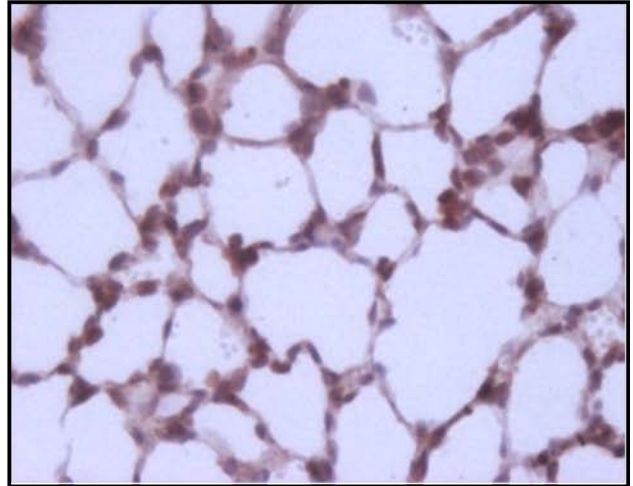

**MCT+Null-ECs**

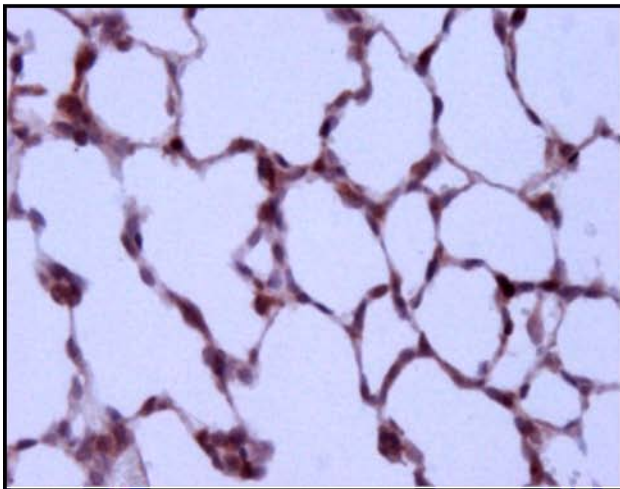

**MCT+IL8RA/B-ECs**

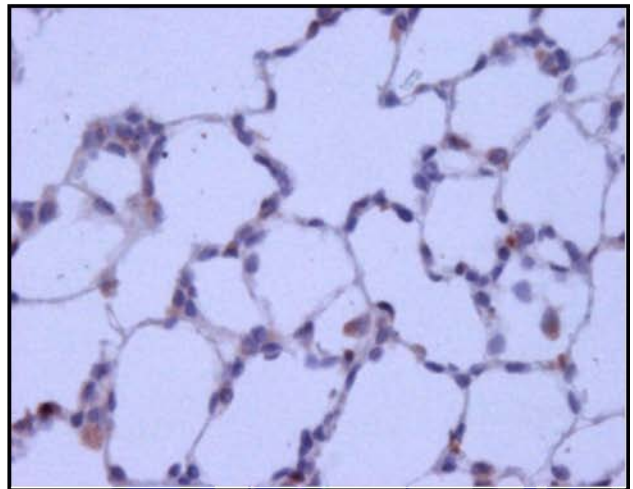

Supplemental Figure XI

## Monocytes/Macrophages in Pulmonary Arterioles

**Vehicle**

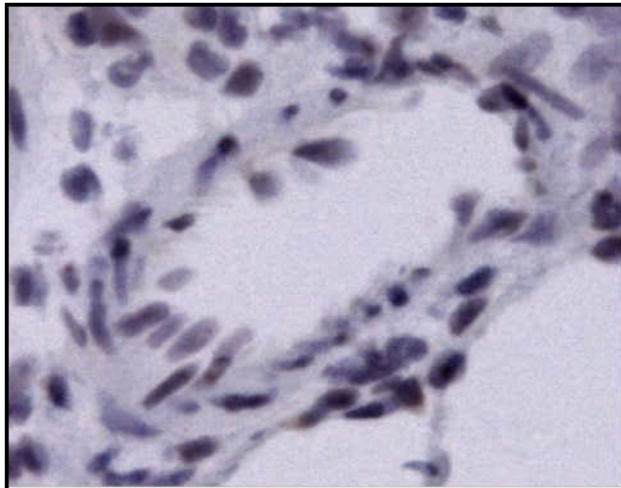

**MCT Alone**

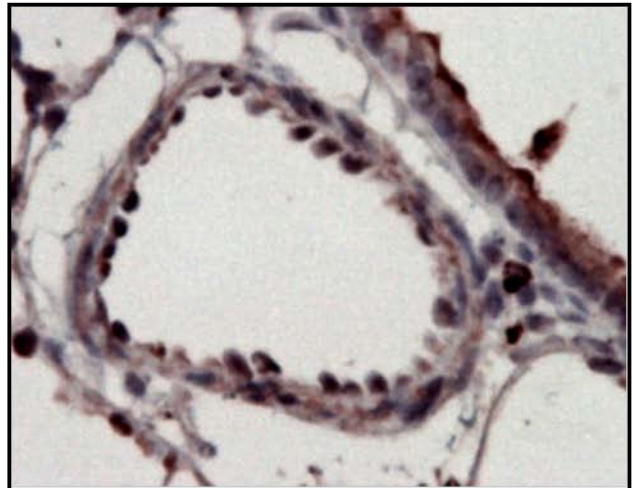

**MCT+Null-ECs**

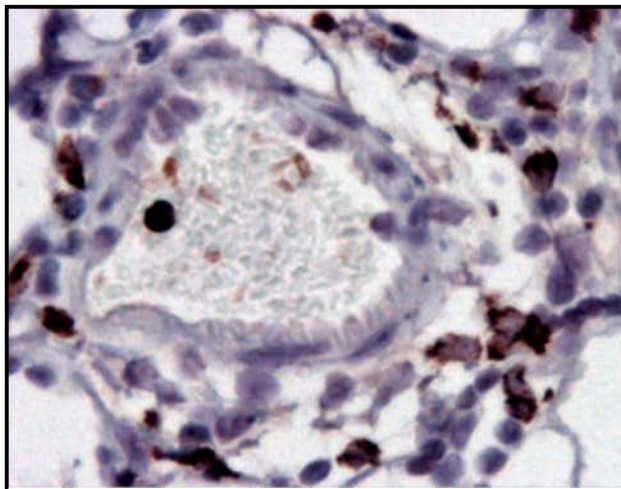

**MCT+IL8RA/B-ECs**

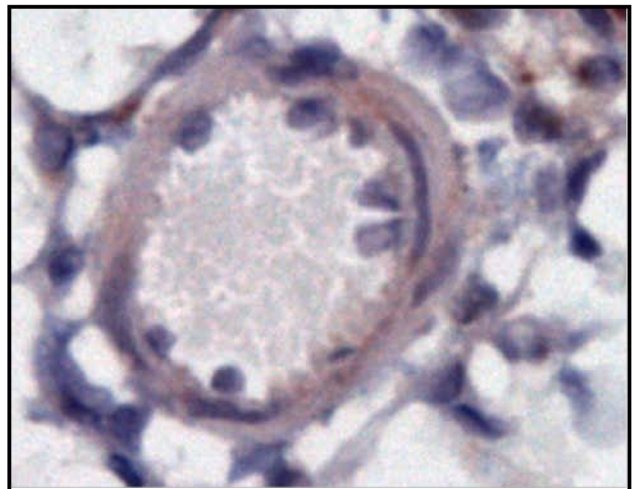

Supplemental Figure XII

## Monocytes/Macrophages in Alveoli

**Vehicle**

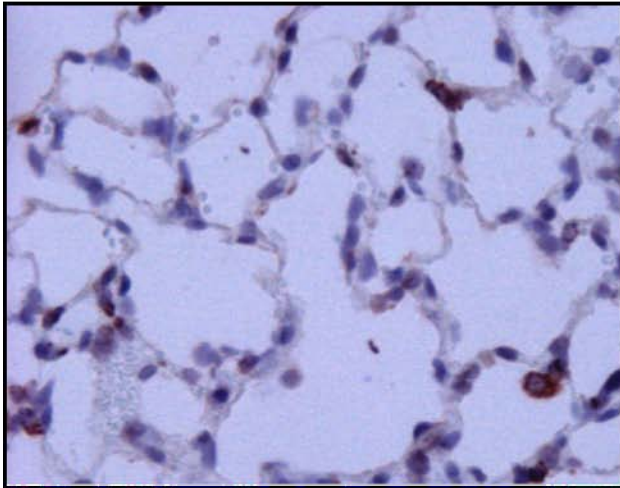

**MCT Alone**

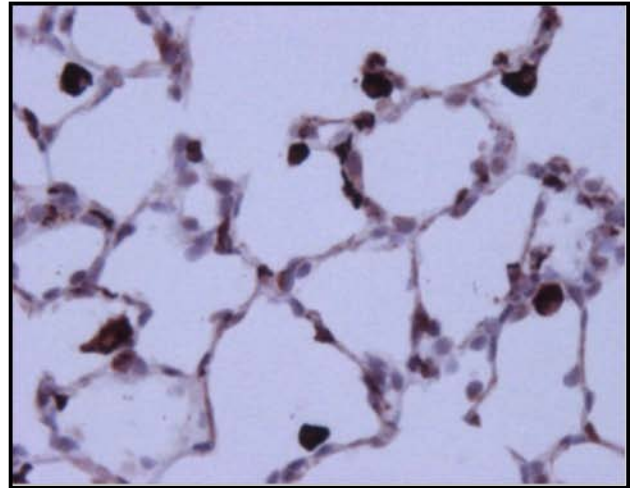

**MCT+Null-ECs**

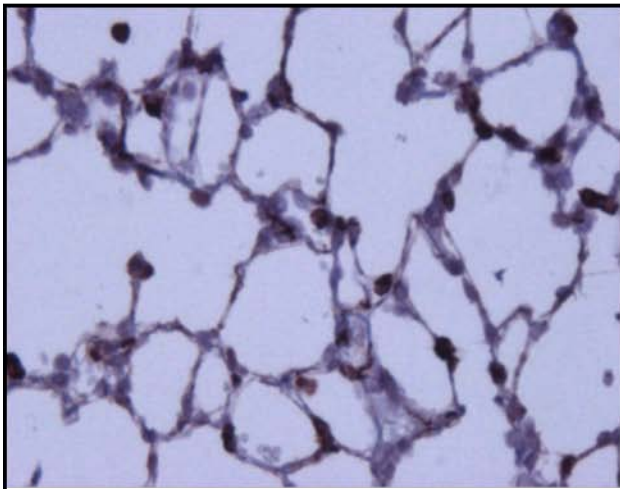

**MCT+IL8RA/B-ECs**

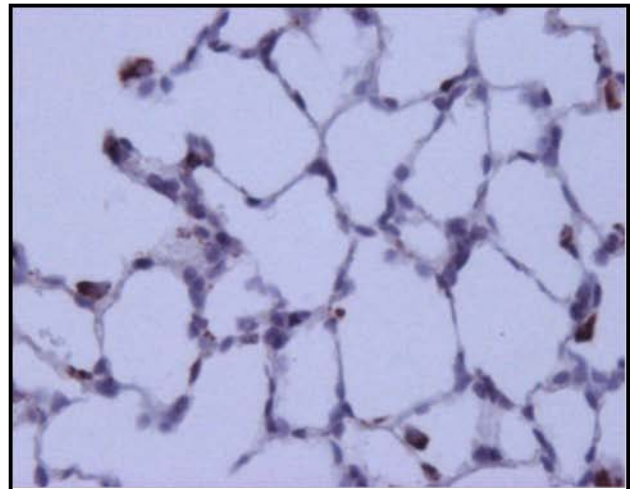

Supplemental Figure XIII
